# Supplementary material
Source: PubMed Central journal article supplement (PMC6055934)
Supplement: NIHMS980487-supplement-1.pdf [file NIHMS980487-supplement-1.pdf]

1 **Supplementary of**

2 **Assessing global surface water inundation dynamics using combined satellite information**

3 **from SMAP, AMSR2 and Landsat**

4

5 **1. Comparisons of  $f_{w_{LBand}}$  and MOD44W for different latitude zones**

6 Inundation areas derived from SMAP  $f_{w_{LBand}}$  and MOD44W data were compared for five  
7 latitude zones. The comparisons were based on  $f_{w_{LBand}}$  monthly composites from June 2015 to  
8 May 2016, and with both SMAP and MOD44W data projected in the same 36-km EASE-Grid v2  
9 format. We excluded grid cells dominated by large water bodies (coverage  $\geq 50\%$ ) to mitigate  
10 coastal contamination (Schroeder et al., 2015); we also excluded grid cells dominated by  
11 permanent snow/ice cover, identified by a MODIS IGBP land cover classification. Both monthly  
12 maximum SMAP  $f_{w_{LBand}}$  and MOD44W results show that the largest inundation areas are  
13 spatially distributed in tropical and Northern high latitude regions, while the SMAP results  
14 generally detect greater inundation than the MOD44W results (Table S1).

15 **Table S1**

16 Inundation areas estimated by SMAP monthly  $f_{w_{LBand}}$  composites and MOD44W over the global domain and  
17 five major latitudinal zones, excluding 36-km grid cells with open water or permanent snow/ice coverage  $\geq$   
18 50%.

19

| Latitude Zone | SMAP water extent (MKM <sup>2</sup> ) |         |         | MOD44W water extent (MKM <sup>2</sup> ) |
|---------------|---------------------------------------|---------|---------|-----------------------------------------|
|               | Minimum                               | Maximum | Average |                                         |
| 90°S-90°N     | 4.61                                  | 7.15    | 6.16    | 4.04                                    |
| 50°N-90°N     | 0.24                                  | 2.17    | 1.25    | 1.95                                    |

|           |      |      |      |      |
|-----------|------|------|------|------|
| 30°N-50°N | 1.19 | 2.13 | 1.57 | 0.70 |
| 30°S-30°N | 2.51 | 3.22 | 2.83 | 1.18 |
| 30°S-50°S | 0.32 | 0.62 | 0.45 | 0.17 |
| 50°S-90°S | 0.04 | 0.05 | 0.05 | 0.04 |

20

21 **2. Comparisons Between SMAP  $f_{wLBand}$  and River Discharge Data for Amazon river basin**

22 The Amazon basin (Fig. S1) is one of the most important and largest river basins, where the  
23 Amazon river and its tributaries carry water through the world largest tropical rain forest. We  
24 analyzed the performance of the SMAP  $f_{wLBand}$  retrievals over the Amazon basin by comparing  
25 SMAP derived inundation areas against monthly mean discharge measured at Obidos, Brazil  
26 located near the mouth of Amazon river. The discharge data were provided by the Observation  
27 Service for the Geodynamical, Hydrological and Biogeochemical Control of Erosion/Alteration  
28 and Material Transport in the Amazon, Orinoco, and Congo basins (SO HYBAM)  
29 (<http://www.ore-hybam.org/>). Strong correlation ( $R=0.72$ ) was found between the monthly  
30  $f_{wLBand}$  inundation dynamics and observed river discharge data (Fig.2S). The  $f_{wLBand}$   
31 correspondence was further enhanced ( $R= 0.95$ ) after introducing a one-month lag between  
32 surface inundation and downstream river discharge to account for the delayed movement of  
33 water from the uplands to the basin outlet. The relatively strong correlation occurs despite 67.2%  
34 of the basin having VOD levels above the expected threshold for reliable SMAP L-band  $f_w$   
35 retrievals (e.g. Fig. 3). However, the favourable correspondence is consistent with a prior  
36 regional study of  $f_w$  dynamics in Amazon rainforests using similar L-band  $T_b$  retrievals from  
37 SMOS (Parrens et al., 2017).

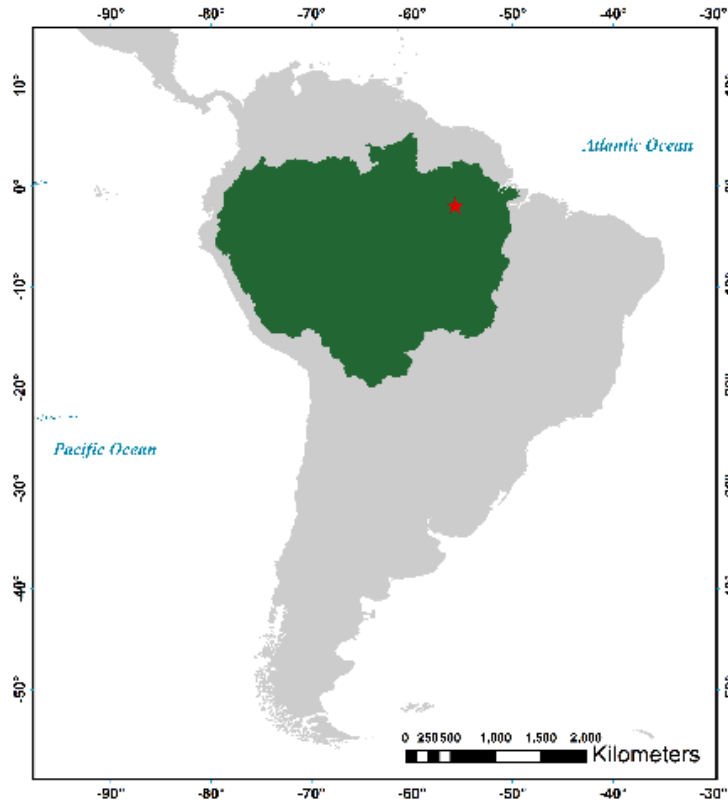

38

39

**Fig.S1** Location of Amazon river basin, with river discharge station indicated by red star symbol.

40

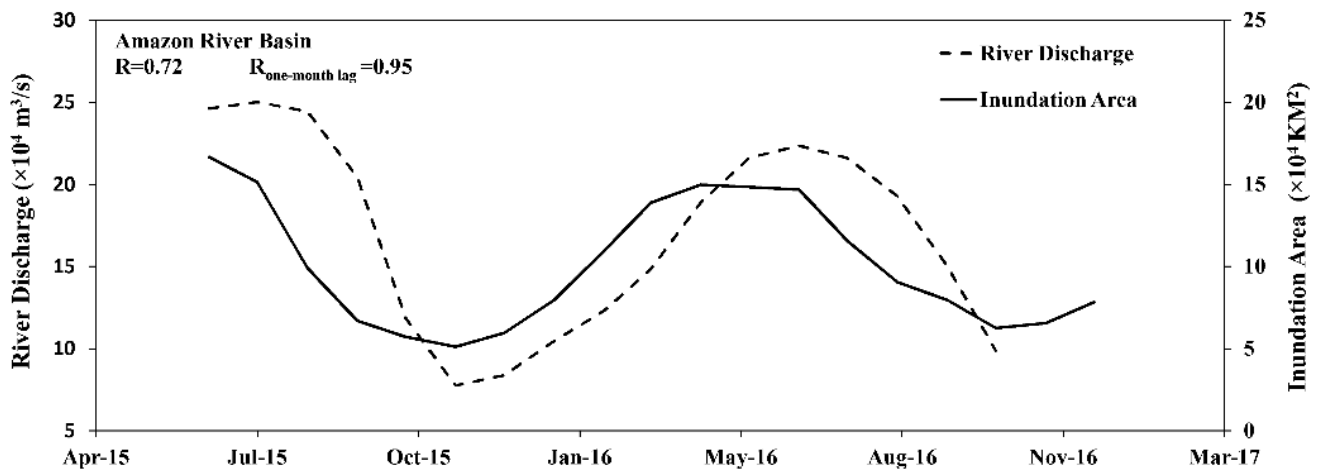

41

42

**Fig.S2** Monthly mean river discharge ( $Q$ ,  $\text{m}^3/\text{s}$ ) and corresponding inundation areas ( $\text{km}^2$ ) derived from SMAP 36 km  $f_{\text{WLBand}}$

43

monthly averages for the Amazon river basin.

44
